# Supplementary material
Source: PubMed Central journal article supplement (PMC3423530)
Supplement: NIHMS385140-supplement-1_si_001.pdf [file NIHMS385140-supplement-1_si_001.pdf]

Supporting Information

**Targeted Metabolomics Reveals a Male Pheromone and Sex-Specific  
Ascaroside Biosynthesis in *Caenorhabditis elegans***

Yevgeniy Izrayelit<sup>1</sup>, Jagan Srinivasan<sup>2</sup>, Sydney L. Campbell<sup>1</sup>, Yeara Jo<sup>2</sup>, Stephan H. von Reuss<sup>1</sup>, Margaux C. Genoff<sup>1</sup>, Paul W. Sternberg<sup>2</sup>, Frank C. Schroeder<sup>1\*</sup>

1. Boyce Thompson Institute and Department of Chemistry and Chemical Biology, Cornell University, Ithaca, New York 14853, United States

2. Howard Hughes Medical Institute and Division of Biology, California Institute of Technology, Pasadena, California 91125, United States

**\*Corresponding Author:** [schroeder@cornell.edu](mailto:schroeder@cornell.edu)

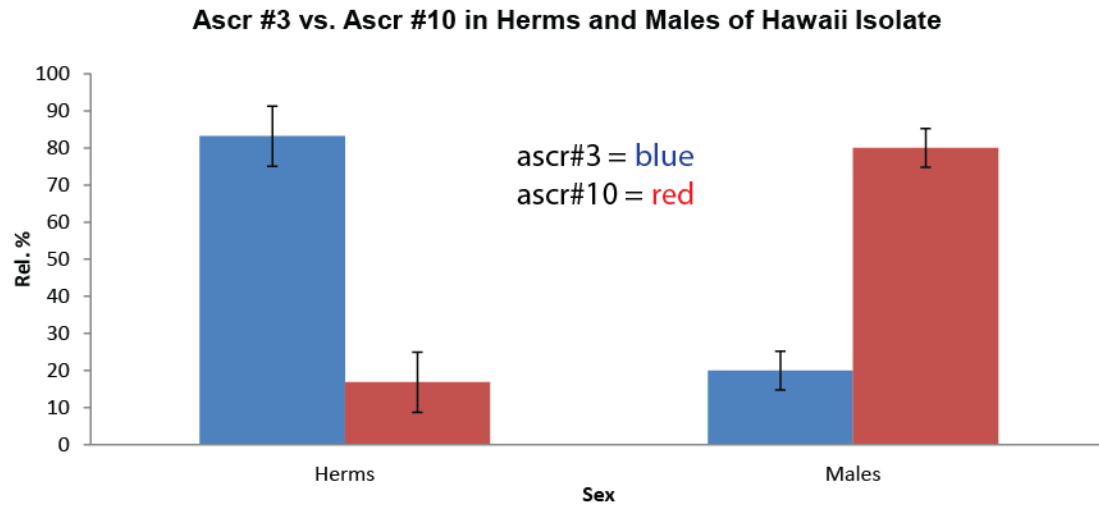

**Figure S1.** Relative abundances of ascr#10 and ascr#3 in males and hermaphrodites of *C. elegans* wild-type strain CB4856 (isolated at Hawaii). Error bars: SD.

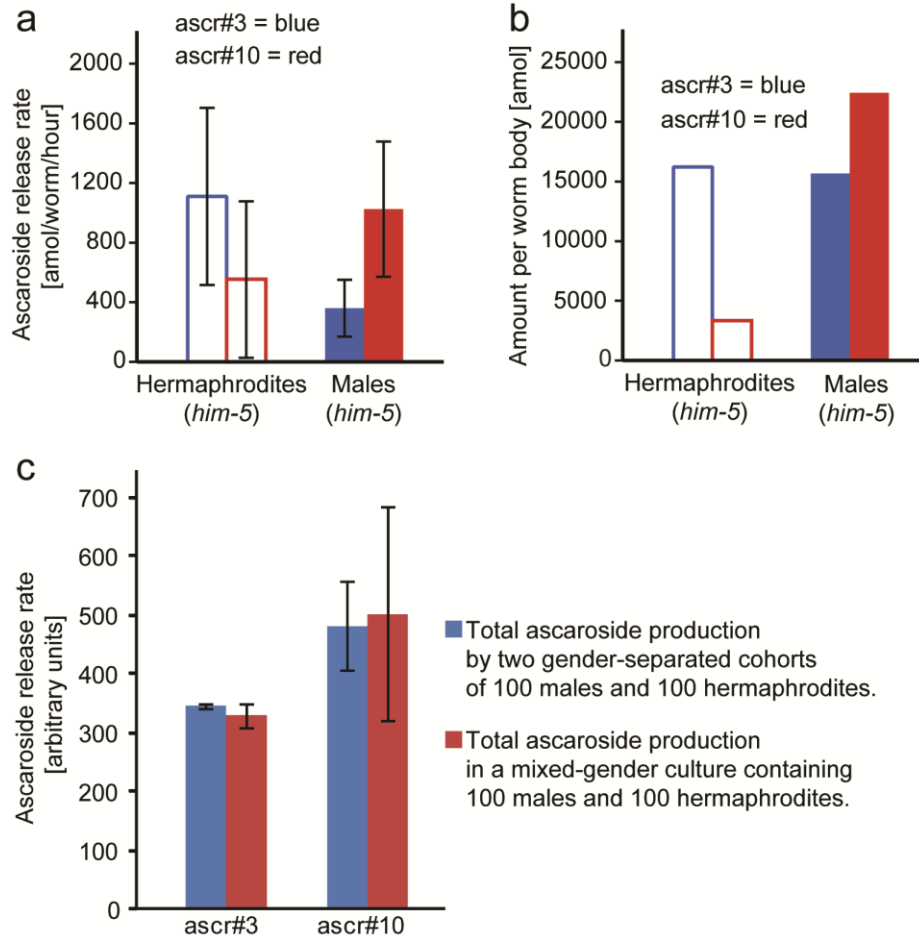

**Figure S2.** Ascaroside production in males and hermaphrodites (error bars: SD). a) Ascaroside release rates of *him-5* males and hermaphrodites. b) Ascaroside content of worm whole-body extracts (*him-5* males and hermaphrodites). c) Comparison of ascaroside production by separate and mixed cohorts of wild-type males and hermaphrodites. ascr#3 and ascr#10 production of a mixed cohort of males and hermaphrodites (red) is very similar to gender-averaged ascaroside production in separately incubated males and hermaphrodites (see Methods for details).

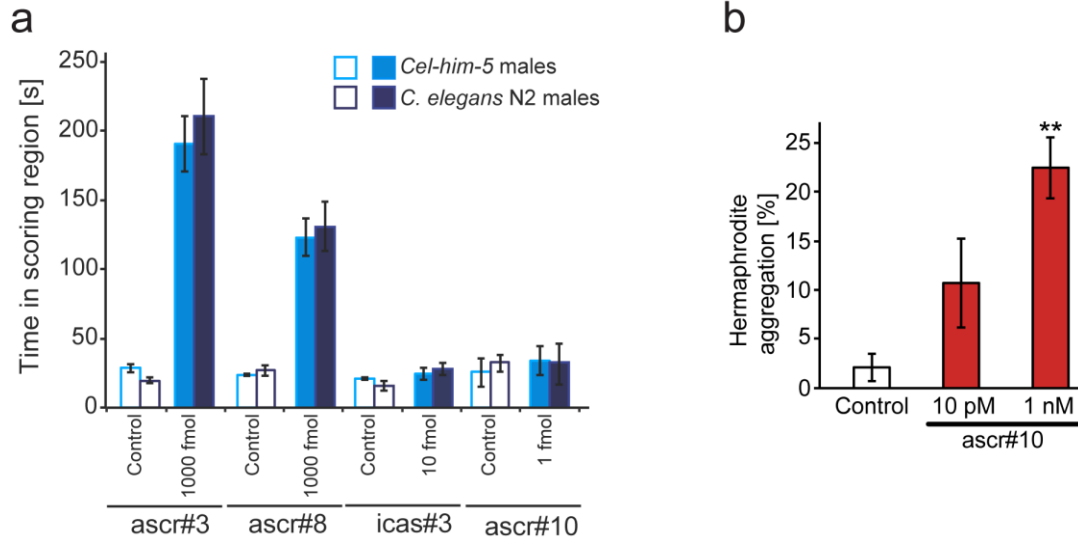

**Figure S3.** a) Comparison of ascaroside responses of *him-5* and wild-type males. Wild-type male responses to previously described male-specific attractants *ascr#3* and *ascr#8* and to the hermaphrodite-specific attractants *icas#3* and *ascr#10* are indistinguishable from those of *him-5* males. (1) *icas#3* and *ascr#10* were assayed at concentrations that elicit strong attraction or retention in hermaphrodites. b) *Ascr#10* increases aggregation behavior of normally solitary N2 hermaphrodites; (1) one-factor ANOVA followed by Dunnett's post-test, \*P < 0.05, \*\*P < 0.01.

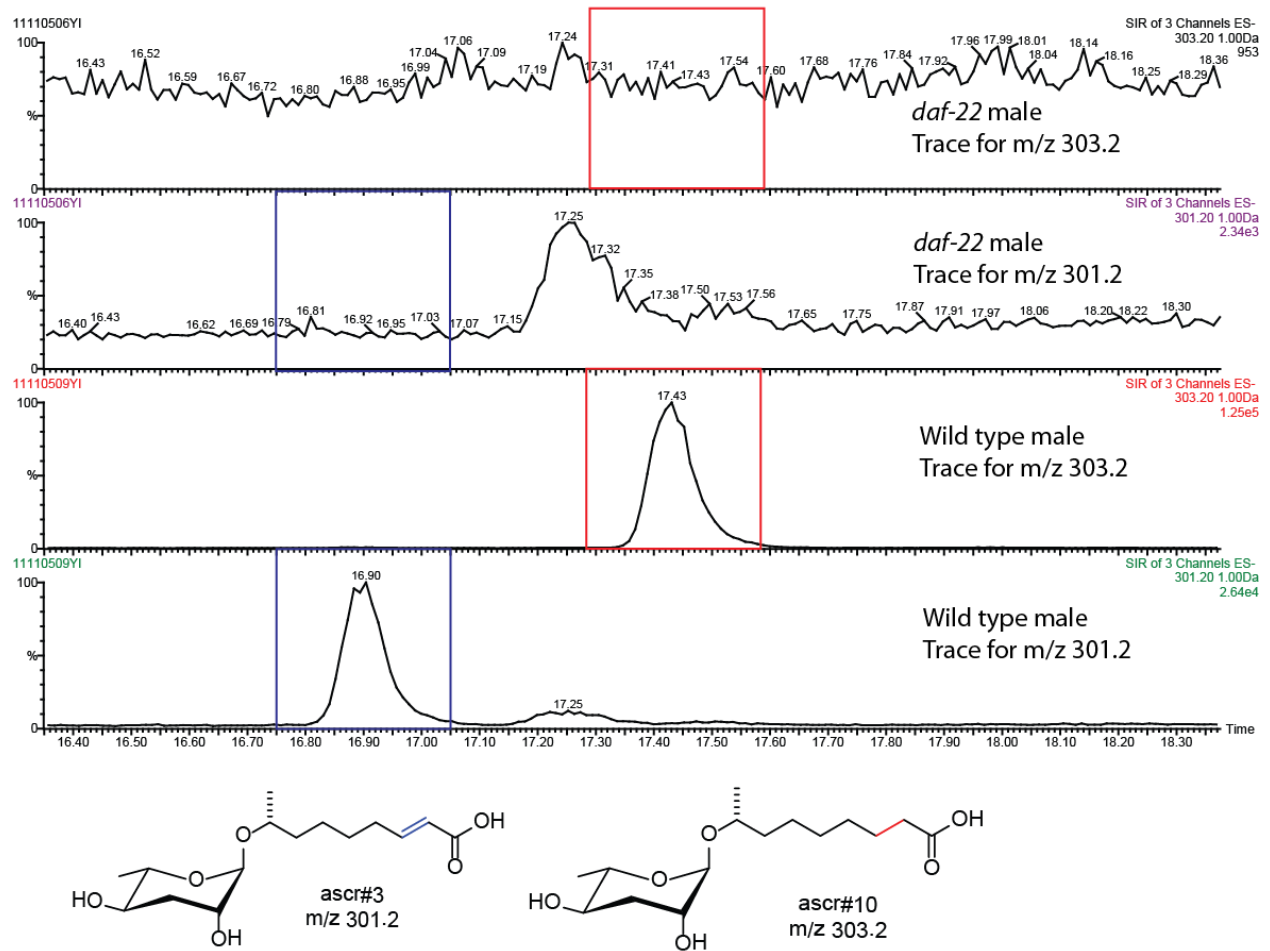

**Figure S4.** HPLC-MS analysis of *daf-22* male exometabolome. Shown are ion traces for *m/z* of 303.2 (ascr#10) and *m/z* of 301.2 (ascr#3) obtained via HPLC-MS analysis (ESI<sup>-</sup>) of samples from 100 *daf-22* mutant males and 100 wild-type (N2 Bristol) males. Blue boxes highlight the retention time window for ascr#3 (16.90±0.02 min) and red boxes highlight the retention time window for ascr#10 (17.44±0.02 min).(2)

## References

1. Srinivasan, J., von Reuss, S. H., Bose, N., Zaslaver, A., Mahanti, P., Ho, M. C., O'Doherty, O. G., Edison, A. S., Sternberg, P. W., and Schroeder, F. C. (2012) A Modular Library of Small Molecule Signals Regulates Social Behaviors in *Caenorhabditis elegans*, *PLoS Biol.* 10, e1001237.
2. von Reuss, S. H., Bose, N., Srinivasan, J., Yim, J. J., Judkins, J. C., Sternberg, P. W., and Schroeder, F. C. (2012) Comparative metabolomics reveals biogenesis of ascarosides, a modular library of small molecule signals in *C. elegans*, *J. Am. Chem. Soc.* 134, 1817–1824.
